# Supplementary material for: Sensitivity of biogenic volatile organic compound emissions to leaf area index and land cover in Beijing
Source: Copernicus journal article supplement (doi:10.5194/acp-18-9583-2018), 2018-07-09
Supplement: Supplementary file 1 [file acp-18-9583-2018-supplement.pdf]

Supplement of Atmos. Chem. Phys., 18, 9583–9596, 2018  
<https://doi.org/10.5194/acp-18-9583-2018-supplement>  
© Author(s) 2018. This work is distributed under  
the Creative Commons Attribution 4.0 License.

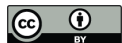

*Supplement of*

## **Sensitivity of biogenic volatile organic compound emissions to leaf area index and land cover in Beijing**

**Hui Wang et al.**

*Correspondence to:* Qizhong Wu (wqizhong@bnu.edu.cn)

The copyright of individual parts of the supplement might differ from the CC BY 4.0 License.

## Supplement:

**Table 1. The species composition of vegetation in Beijing and their standard emission rates of isoprene, area, specific leaf area (SLA) and leaf mass per area (LMA).**

| Species                       | Emission<br>( $\mu\text{g C g}^{-1}\text{h}^{-1}$ ) | Area<br>( $\text{km}^2$ ) | SLA<br>( $\text{cm}^2\text{g}^{-1}$ ) | LMA<br>( $\text{g m}^{-2}$ ) | Dominant tree species                                                     |
|-------------------------------|-----------------------------------------------------|---------------------------|---------------------------------------|------------------------------|---------------------------------------------------------------------------|
| <i>Needle Leaf Trees</i>      |                                                     |                           |                                       |                              |                                                                           |
| <i>Pinus tabulaeformis</i>    | 0.4 <sup>a</sup>                                    | 526                       | 64.1 <sup>e, g, f</sup>               | 156.0                        | <i>Pinus tabulaeformis</i>                                                |
| <i>Larix</i>                  | 7.4 <sup>b</sup>                                    | 44                        | 98.9 <sup>e, f</sup>                  | 101.1                        | <i>Larix gmelinii</i> var. <i>principis-rupprechtii</i>                   |
| <i>Picea</i>                  | 4.1 <sup>b</sup>                                    | 4                         | 57.9 <sup>e, f</sup>                  | 172.7                        | <i>Picea wilsonii</i> , <i>Picea koraiensis</i> ,<br><i>Picea meyeri</i>  |
| <i>Platycladus orientalis</i> | 0.0 <sup>c</sup>                                    | 649                       | 66 <sup>e, g, i</sup>                 | 151.5                        | <i>Platycladus orientalis</i>                                             |
| <i>Broad Leaf Trees</i>       |                                                     |                           |                                       |                              |                                                                           |
| <i>Quercus</i>                | 223.5 <sup>a, b*</sup>                              | 720                       | 126.9 <sup>e, g, j</sup>              | 78.8                         | <i>Quercus mongolica</i> , <i>Quercus liaotungensis</i>                   |
| <i>Betula</i>                 | 0.0 <sup>b</sup>                                    | 157                       | 141 <sup>e, k</sup>                   | 70.9                         | <i>Betula platyphylla</i> , <i>Betula dahurica</i>                        |
| <i>Juglans mandshurica</i>    | 0.0 <sup>b</sup>                                    | 85                        | 201.9 <sup>i, l</sup>                 | 40.3                         | <i>Juglans mandshurica</i>                                                |
| <i>Ulmus</i>                  | 0.0 <sup>b</sup>                                    | 106                       | 142.7 <sup>i, m</sup>                 | 70.1                         | <i>Ulmus laciniata</i> , <i>Ulmus pumila</i> ,<br><i>Ulmus macrocarpa</i> |
| <i>Robinia pseudoacacia</i>   | 49.8 <sup>b</sup>                                   | 207                       | 317 <sup>i, n, o</sup>                | 31.5                         | <i>Robinia pseudoacacia</i>                                               |
| <i>Populus</i>                | 105.8 <sup>a</sup>                                  | 570                       | 158.6 <sup>g, i, l</sup>              | 63.1                         | <i>Populus davidiana</i>                                                  |
| <i>Salix</i>                  | 70.2 <sup>c</sup>                                   | 60                        | 150.6 <sup>i</sup>                    | 66.4                         | <i>Salix matsudana</i>                                                    |
| <i>Pyrus</i>                  | 0.0 <sup>a</sup>                                    | 8                         | 173.4 <sup>i</sup>                    | 57.7                         | <i>Pyrus ussuriensis</i>                                                  |
| <i>Armeniaca vulgaris</i>     | 0.1 <sup>a</sup>                                    | 12                        | 129.2 <sup>i</sup>                    | 77.4                         | <i>Armeniaca vulgaris</i>                                                 |
| <i>Diospyros kaki</i>         | 0.1 <sup>a</sup>                                    | 8                         | 142 <sup>o</sup>                      | 70.4                         | <i>Diospyros kaki</i>                                                     |
| <i>Juglans regia</i>          | 0.0 <sup>a</sup>                                    | 8                         | 201.9 <sup>i, k, l</sup>              | 49.5                         | <i>Juglans regia</i>                                                      |
| <i>Castanea mollissima</i>    | 0.0 <sup>a</sup>                                    | 4                         | 87.3 <sup>p</sup>                     | 114.5                        | <i>Castanea mollissima</i>                                                |
| <i>Ginkgo biloba</i>          | 0.0 <sup>c</sup>                                    | 28                        | 154.3 <sup>i, m, q</sup>              | 64.8                         | <i>Ginkgo biloba</i>                                                      |
| <i>Fraxinus chinensis</i>     | 0.02 <sup>d</sup>                                   | 73                        | 244.4 <sup>n, r, s</sup>              | 40.9                         | <i>Fraxinus chinensis</i>                                                 |
| <i>Quercus variabilis</i>     | 65.5 <sup>a</sup>                                   | 80                        | 99.2 <sup>t</sup>                     | 100.8                        | <i>Quercus variabilis</i>                                                 |
| <i>Tilia</i>                  | 0.0 <sup>a</sup>                                    | 85                        | 230.9                                 | 43.3 <sup>u</sup>            | <i>Tilia mongolica</i> , <i>Tilia mandshurica</i>                         |
| <i>Paulownia</i>              | 0                                                   | 4                         | 245.7                                 | 40.7 <sup>v</sup>            |                                                                           |
| <i>Other broadleaf forest</i> | -                                                   | 852                       | -                                     | -                            |                                                                           |
| <i>Grass</i>                  |                                                     |                           |                                       |                              |                                                                           |
| <i>Grass</i>                  | 0.2 <sup>a</sup>                                    | -                         | -                                     | 60                           |                                                                           |
| <i>Shrub</i>                  |                                                     |                           |                                       |                              |                                                                           |
| <i>Shrub</i>                  | 8 <sup>a</sup>                                      | -                         | -                                     | 60                           |                                                                           |
| <i>Crop</i>                   |                                                     |                           |                                       |                              |                                                                           |
| <i>Other Crop</i>             | 0.03 <sup>a</sup>                                   | -                         | -                                     | 60                           |                                                                           |
| <i>Corn</i>                   | 0.0 <sup>a</sup>                                    | -                         | -                                     | 60                           |                                                                           |

- <sup>a</sup> Wang, Z., Bai, Y., and Zhang, S.: A biogenic volatile organic compounds emission inventory for Beijing, *Atmospheric environment*, 37, 3771-3782, 2003.
- <sup>b</sup> Klinger, L. F., Li, Q. J., Guenther, A. B., Greenberg, J. P., Baker, B., and Bai, J. H.: Assessment of volatile organic compound emissions from ecosystems of China, *Journal of Geophysical Research: Atmospheres*, 107, ACH 16-11-ACH 16-21, 10.1029/2001jd001076, 2002.
- <sup>c</sup> Wang, Z.H., Zhang, S.Y., Lu, S.H., Bai, Y.H.: Screenings of 23 plant species in Beijing for volatile organic compound emissions. *Environmental Science*, 24, 7-12, 2013. (in Chinese)
- <sup>d</sup> Ghirardo, A., Xie, J., Zheng, X., Wang, Y., Grote, R., Block, K., Wildt, J., Mentel, T., Kiendler-Scharr, A., Hallquist, M., Butterbach-Bahl, K., and Schnitzler, J.-P.: Urban stress-induced biogenic VOC emissions and SOA-forming potentials in Beijing, *Atmospheric Chemistry and Physics*, 16, 2901-2920, 10.5194/acp-16-2901-2016, 2016.
- <sup>e</sup> Ren, Y. X., Zhang, Y., Hou, J. H., Li, Y., and Yao, Q.: A comparative study on the functional traits of the main forest communities in Xishan, Beijing. *Journal of Green Science and Technology*, (3), 8-9, 2012. (in Chinese)
- <sup>f</sup> Li, M. C., Zhu, J. J., and Sun, Y. R.: Responses of specific leaf area of dominant tree species in Northeast China secondary forests to light intensity. *Chinese Journal of Ecology*, 28(8), 1437-1442, 2009. (in Chinese)
- <sup>g</sup> Lü, J. Z., Miao, Y. M., Zhang, H. F., and Bi, R. C.: Comparisons of leaf traits among different functional types of plant from Huoshan Mountain in the Shanxi Province. *Journal of Wuhan Botanical Research*, 28(4), 460-465, 2010. (in Chinese)
- <sup>h</sup> Diao, J., Guo, H., Lu, J., Lei, X. D., and Tang, S. Z.: Leaf area estimation model and specific leaf area of Chinese pine. *Forest Research*, 26(2), 174-180, 2013. (in Chinese)
- <sup>i</sup> Wang, K., Wang, D. H., Wei, J., Zou, D. J., and Lu, H.: Growth of leaves of main landscaping tree species in northwest Liaoning Province. *Arid Zone Research*, 30(4), 640-645, 2013. (in Chinese)
- <sup>j</sup> Qi, J., Ma, K. M., and Zhang, Y. X.: Comparisons on leaf traits of *Quercus liaotungensis* Koidz. on different slope positions in Dongling Mountain of Beijing. *Acta Ecologica Sinica*, 28(1), 122-128, 2008. (in Chinese)
- <sup>k</sup> Gong, H., Guo, W., Wang, C. G., and Geng, Z. Z.: Function traits and correlation characteristics of common tree species in Maoer Mountain. *Journal of Beihua University (Natural Science)*, 17(4), 455-462, 2016. (in Chinese)
- <sup>l</sup> Bao, L. and Liu, Y. H.: Comparison of leaf functional traits in different forest communities in Mt. Dongling of Beijing. *Acta Ecologica Sinica*, 29(7), 3692-3703, 2009. (in Chinese)
- <sup>m</sup> Ren, Y., Ge, Y., Gu, B. J., Min, Y., Tani, A., and Chang, J.: Role of management strategies and environmental factors in determining the emissions of biogenic volatile organic compounds from urban greenspaces. *Environ. Sci. Technol.*, 48 (11), 6237-6246, 2014.
- <sup>n</sup> Dong, Z. Y., Bai, X. F., Hou, Y. P., and Bu, Q. M.: Leaf calorific value of 8 tree species in the coastal areas of Jiaodong and cost of construction of leaf biomass and its adaptability. *Scientia Silvae Sinicae*, 51(3), 8-15, 2015. (in Chinese)
- <sup>o</sup> Wang, C., Zhou, J., Xiao, H., Liu, J., and Wang, L.: Variations in leaf functional traits among plant species grouped by growth and leaf types in Zhenjiang, China. *Journal of Forestry Research*, 28(2), 241-248, 2017.
- <sup>p</sup> Peng, J. J., Guo, S. J., Wang, J., Xu, C., and Ren, S.: Effect of different pruning intensity on leaf traits and photosynthetic characteristics of Chinese chestnut with different plant densities. *Journal of Northeast Forestry University*, 42(11), 47-50, 2015. (in Chinese)
- <sup>q</sup> He, C. X., Li, J. Y., Zhang, Y. X., Zheng, Q. S., Xie, B., and Ding, Y. T.: Differences in leaf mass per area, photosynthetic pigments and  $\delta^{13}\text{C}$  by orientation and crown position in five greening tree species. *Chinese Journal of Plant Ecology*, 34(2), 134-143, 2010. (in Chinese)
- <sup>r</sup> Song, L. H., and Gao, S. H.: Effects of traffic pollution on leaf morphological and physiological indexes of greening trees in Yinchuan. *Hubei Agricultural Science*, 54(10), 2423-2427, 2015. (in Chinese)
- <sup>s</sup> Li, L.: Study on the effects of salt stress on 13 tree species. Master Dissertation, Shandong Agricultural University, Taian, Shandong, 2004. (in Chinese)
- <sup>t</sup> Wu, L. L., Kang, H. Z., Zhuang, H. L., and Liu, C. J.: Variations of *Quercus variabilis* leaf traits in relation to climatic factors at regional scale. *Chinese Journal of Ecology*, (12), 2309-2316, 2010. (in Chinese)
- <sup>u</sup> Li, G.Y. The relationship between chlorophyll and SPAD and the related factors for major broadleaved tree species in northeast China. Master Dissertation, Northeast Forestry University, Harbin, Heilongjiang, 2016. (in Chinese)
- <sup>v</sup> Li, S. Y., Hu, H., Sun, X., Wang, B. P., and Qiao, J.: Paulownia Leaf Modal Traits and Their Correlation in a Whole Growth Season. *Forest Research*, 19(5), 660-664, 2006. (in Chinese)
- \* The standard emission rate of *Quercus* is the average value of standard emission rates of *Quercus mongolica* and *Quercus liaotungensis*.

**Table S2. The physical options for the WRF model.**

| Physical mechanism   | Scheme                        |
|----------------------|-------------------------------|
| Microphysics         | WSM 3-class simple ice scheme |
| Long-wave radiation  | RRTM scheme                   |
| Short-wave radiation | Duhbia scheme                 |
| Land Surface         | Noah Land Surface Model       |
| PBL Scheme           | YSU scheme                    |
| Cumulus parameter    | Kain-Fritsch (new Eta) scheme |

**Table S3. The meteorological validation with hourly temperature at 2 m height (T2) in-situ observation. The ME, MB and RMSE are abbreviations for mean error, mean bias, and root mean square error, respectively.**

| Name         | ME (°C) | MB (°C) | r    | RMSE (°C) |
|--------------|---------|---------|------|-----------|
| Beijing      | 1.97    | -0.72   | 0.98 | 2.54      |
| Hai Dian     | 2.11    | -0.65   | 0.98 | 2.7       |
| Chao Yang    | 2.63    | -1.7    | 0.97 | 3.18      |
| Shun Yi      | 2.51    | -1.71   | 0.98 | 3.06      |
| Huai Rou     | 1.93    | -0.07   | 0.98 | 2.48      |
| Tong Zhou    | 5.39    | -5.28   | 0.97 | 5.94      |
| Chang Ping   | 2.18    | -0.96   | 0.98 | 2.81      |
| Yan Qin      | 2.5     | 1.64    | 0.98 | 3.24      |
| Feng Tai     | 3.25    | -2.51   | 0.97 | 3.83      |
| Shijing Shan | 2.05    | -0.44   | 0.98 | 2.61      |
| Da Xing      | 5.56    | -5.36   | 0.96 | 6.27      |
| Fang Shan    | 4.94    | -4.68   | 0.96 | 5.73      |
| Mi Yun       | 2.58    | -0.69   | 0.97 | 3.13      |
| Mengtou Gou  | 2.19    | -0.91   | 0.98 | 2.71      |
| Ping Gu      | 3.52    | -2.87   | 0.97 | 4.2       |
| Shangdian Zi | 1.9     | 0.00    | 0.98 | 2.45      |
| Xiayun Lin   | 2.51    | -1.37   | 0.97 | 3.1       |
| Zhai Tang    | 3.13    | 2.17    | 0.97 | 3.87      |
| Tanghe Kou   | 3.36    | 0.11    | 0.95 | 4.19      |

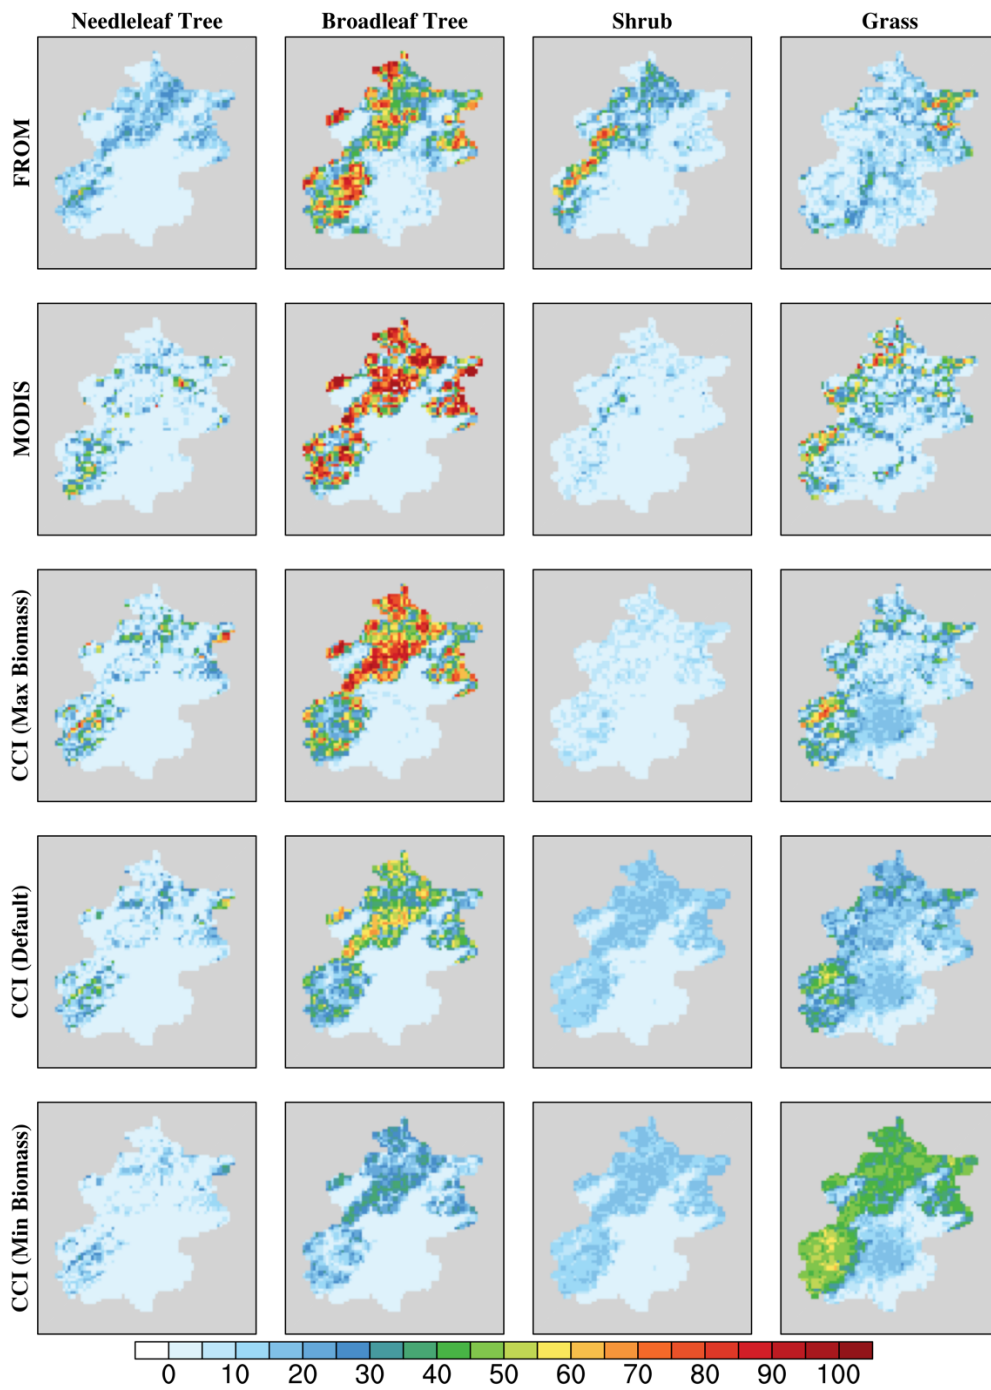

Figure S1. Spatial distribution of the proportions of plant functional types (PFTs) in model grids of all land cover inputs.
